# Supplementary material for: Transformations and enhanced long-range ordering of mesoporous phenolic resin templated by poly(ethylene oxide-b-ε-caprolactone) block copolymers blended with star poly(ethylene oxide)-functionalized silsesquioxane (POSS)
Source: Royal Society of Chemistry journal article supplement (doi:10.1039/c2jm33614f), 2012-01-01
Supplement: c2jm33614f.pdf [file c2jm33614f.pdf]

## Supporting Information

**Transformations and Enhanced Long-Range Ordering of Mesoporous Phenolic Resin Templated by Poly(ethylene oxide-*b*- $\epsilon$ -caprolactone) Block Copolymers Blended With Star Poly(ethylene oxide)-Functionalized Silsesquioxane (POSS)**

**Jheng-Guang Li, Cheng-Yu Chung, and Shiao-Wei Kuo\***

\*Corresponding author: [kuosw@faculty.nsysu.edu.tw](mailto:kuosw@faculty.nsysu.edu.tw)

Department of Materials and Optoelectronic Science, Center for Nanoscience and Nanotechnology, National Sun Yat-Sen

University, Kaohsiung, 804, Taiwan.

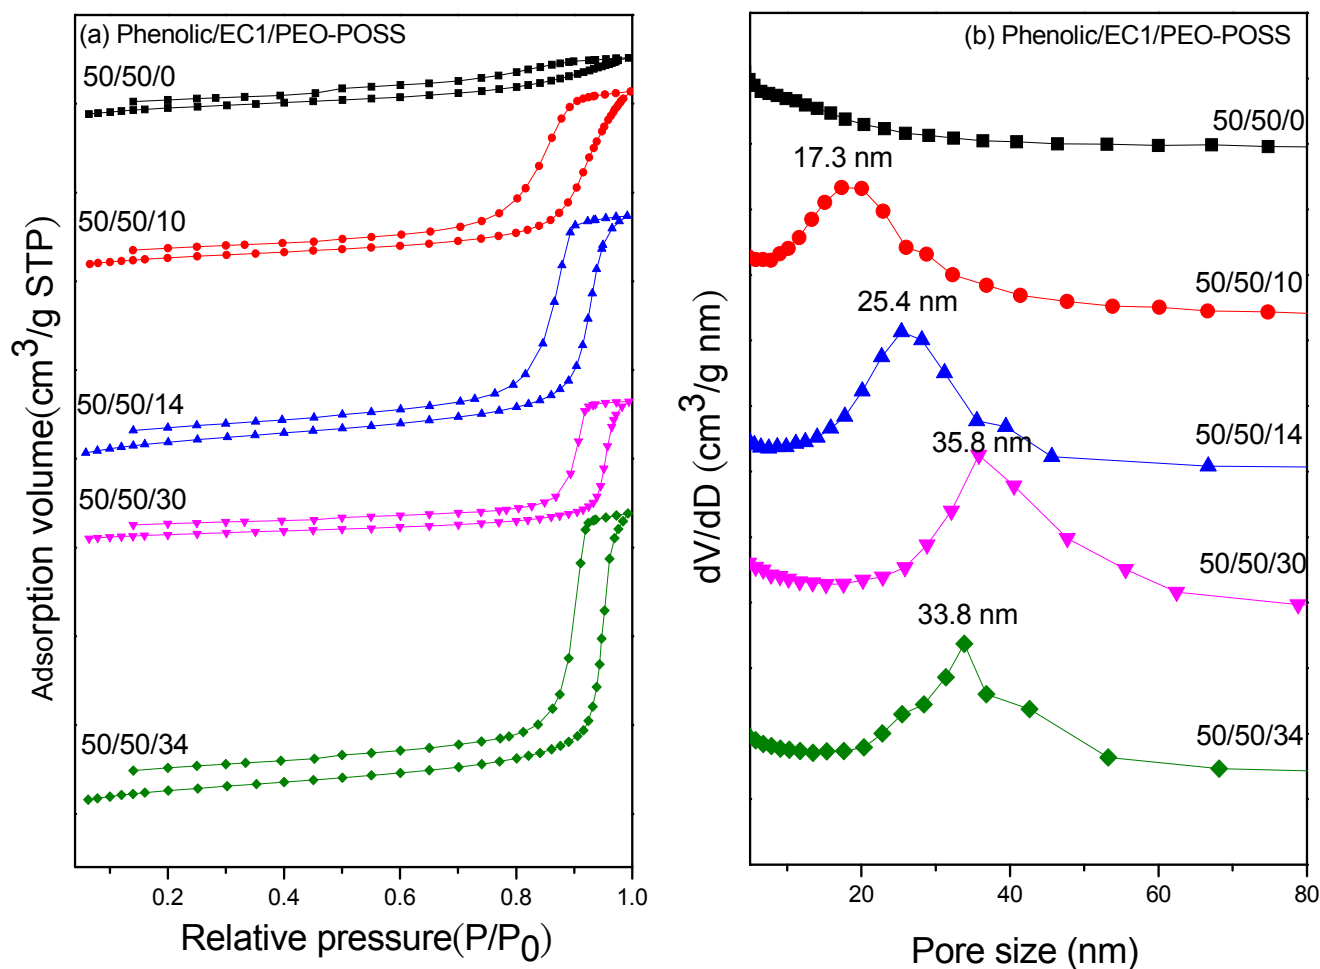

Figure S1: (a) N<sub>2</sub> adsorption/desorption isotherms and (b) pore size distribution curves of mesoporous phenolic resins templated by EC1/PEO-POSS blends.

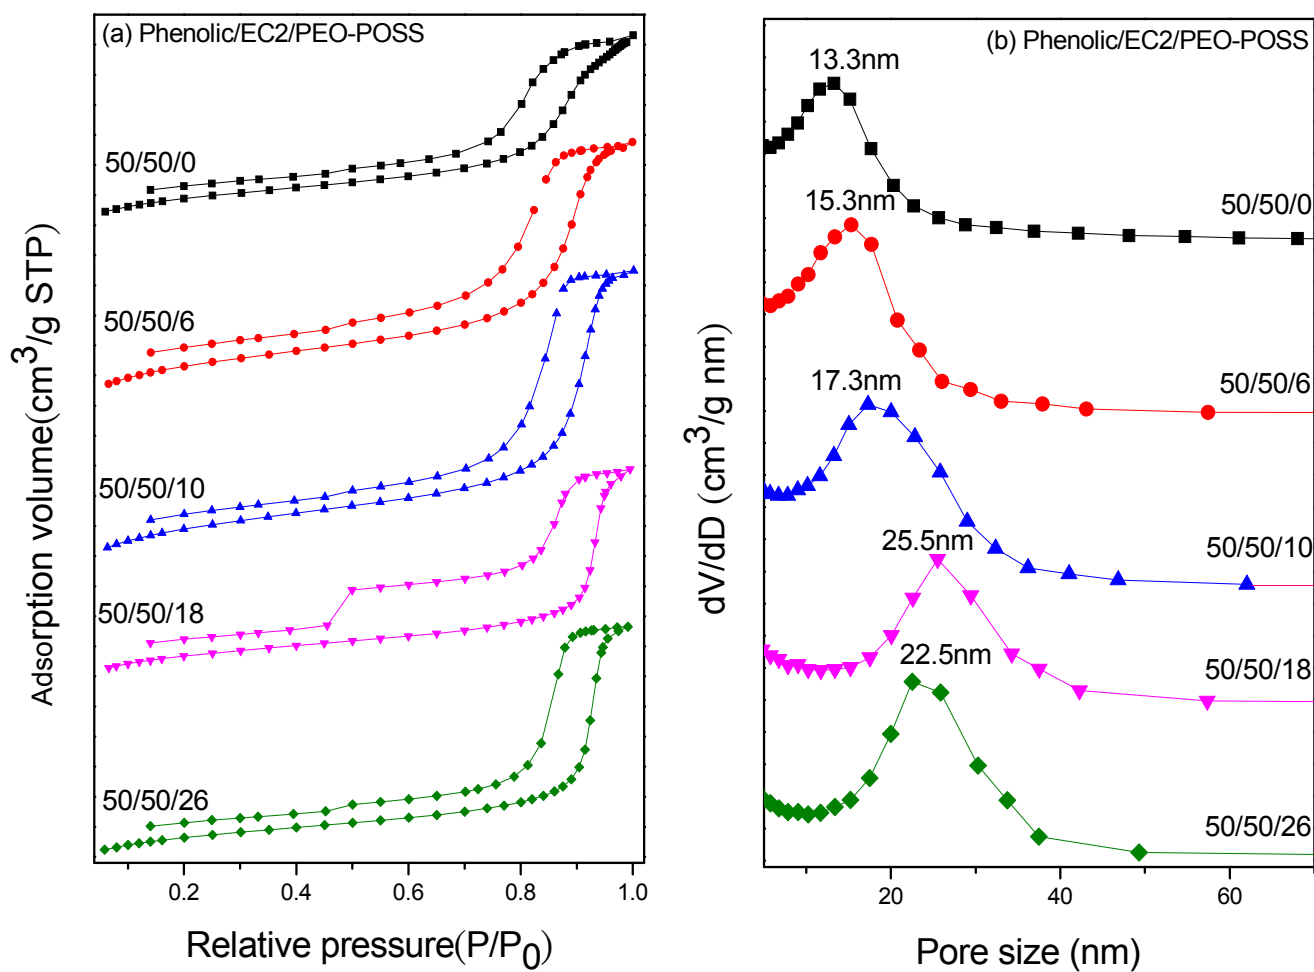

Figure S2: (a) N<sub>2</sub> adsorption/desorption isotherms and (b) pore size distribution curves of mesoporous phenolic resin structures templated by EC1/PEO-POSS blends.

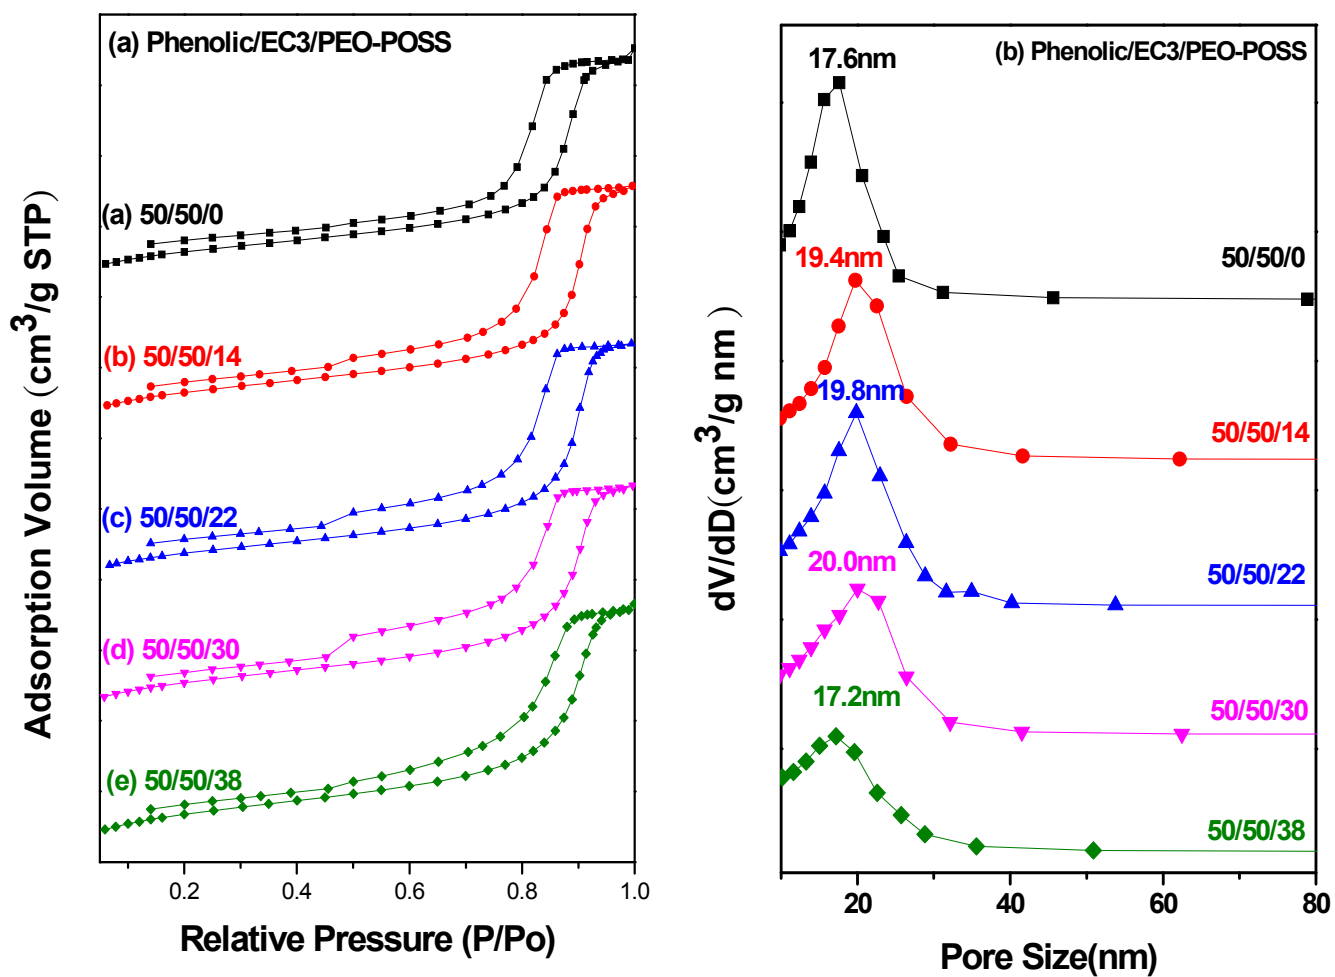

Figure S3: (a) N<sub>2</sub> adsorption/desorption isotherms and (b) pore size distribution curves of mesoporous phenolic resin structures obtained from templating EC3/PEO-POSS blends.

Table S1. Textual properties of the mesoporous carbon

| Sample<br>Template    | $d$<br>(nm) <sup>a</sup> | Pore size<br>(nm) | $S_{\text{BET}}$<br>(m <sup>2</sup> /g) <sup>b</sup> | $S_{\text{M}}$<br>(m <sup>2</sup> /g) <sup>b</sup> | Pore<br>volume<br>(cm <sup>3</sup> /g) | Micropore<br>volume<br>(cm <sup>3</sup> /g) |
|-----------------------|--------------------------|-------------------|------------------------------------------------------|----------------------------------------------------|----------------------------------------|---------------------------------------------|
| Phenolic/EC3/PEO-POSS |                          |                   |                                                      |                                                    |                                        |                                             |
| 50/50/0               | 18.6                     | 11.0              | 858                                                  | 647                                                | 0.59                                   | 0.30                                        |
| 50/50/22              | 22.1                     | 13.9              | 749                                                  | 516                                                | 0.65                                   | 0.24                                        |

<sup>a</sup> The  $d$ -spacing values were calculated by the formula  $d = 2\pi/q^*$ . <sup>b</sup>  $S_{\text{BET}}$  and  $S_{\text{M}}$  are the total BET surface area and micropore surface area calculated from the t-plots, respectively.
